# Supplementary material for: Cellular Response to Bone Morphogenetic Proteins-2 and -7 Covalently Bound to Photocrosslinked Heparin–Diazoresin Multilayer
Source: MDPI journal article supplement (doi:10.3390/biom13050842), 2023-05-15
Supplement: s1 [file s1]

# Supplementary Materials

## Cellular Response to Bone Morphogenetic Proteins-2 and -7 Covalently Bound to Photocrosslinked Heparin–Diazoresin Multilayer

Magdalena Wyrwal, Małgorzata Sekuła-Stryjewska, Agata Pomorska, Ewa Oclon,  
Ewa Zuba-Surma, Szczepan Zapotoczny and Krzysztof Szczubiałka

### 1. Covalent bonds formation.

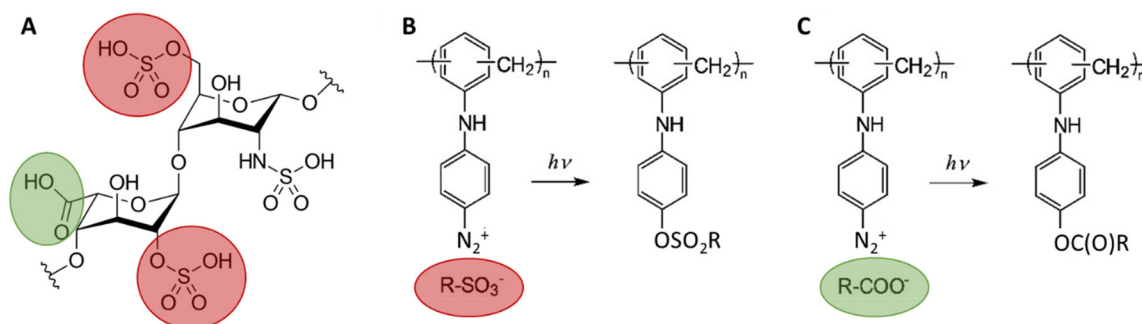

**Figure S1.** (A) Heparin structure with marked groups prone to photocrosslinking with DR. Photocrosslinking reaction between diazonium groups of (B) DR and sulfate and (C) carboxyl groups of HP.

## 2. ELISA assay

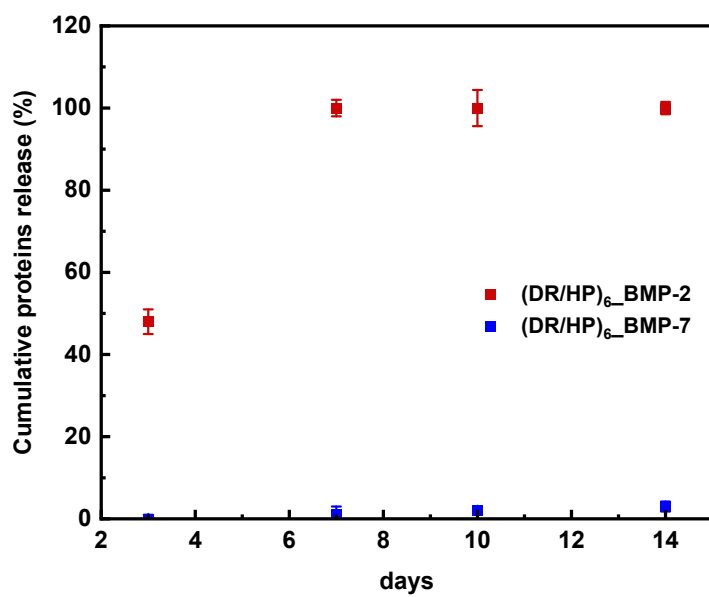

**Figure S2.** Release of rhBMP-2 and rhBMP-7 from (DR/HP)<sub>6</sub> surfaces measured with ELISA assays.

### 3. Cell migration

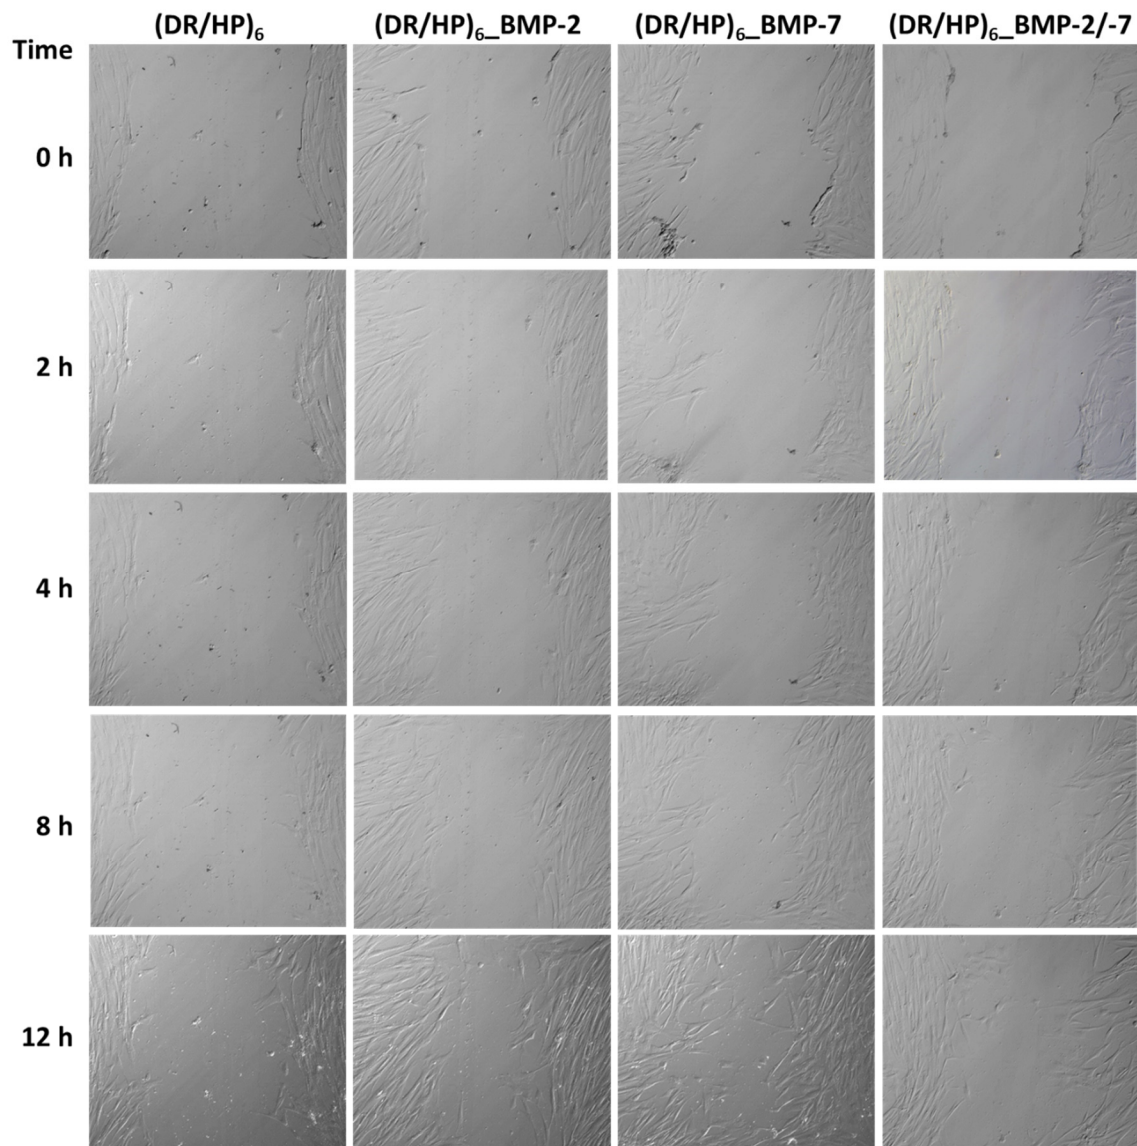

**Figure S3.** Micrographs of hUC-MSC migrating into the scratched cell-free areas taken immediately after “the injury”, after 2, 4, 8 and 12 h of continuous cell migration into the wound.

#### 4. Real-time PCR

**Table S1.** Primer list and primer sequences that were used in quantitative real-time PCR analysis of transcripts involved in osteogenic differentiation. F - forward sequence; R - reverse sequence.

| Primer Name    | Sequence                |
|----------------|-------------------------|
| Human GAPDH -F | CTTTTGCGTCGCCAG         |
| Human GAPDH -R | TTGATGGCAACAATATCCAC    |
| Human ALPL -F  | CTATCCTGGCTCCGTGCTCC    |
| Human ALPL -R  | TTAACTGATGTTCCAATCCTGCG |
| Human OCN -F   | GACTGTGACGAGTTGGCTGA    |
| Human OCN -R   | CTGGAGAGGAGCAGAACTGG    |
| Human RunX2 -F | GGAGTGGACGAGGCAAGAGTTT  |
| Human RunX2 -R | AGCTTCTGTCTGTGCCTTCTGG  |
